## Impact of antithrombotic therapy in the prognosis of atrial fibrillation patients with advanced chronic kidney disease

J.M. Andreu Cayuelas<sup>1</sup>, S. Raposeiras-Roubin<sup>2</sup>, E. Fortuny Frau<sup>3</sup>, A. Garcia Del Egido<sup>4</sup>, J. Sellar-Moya<sup>5</sup>, C. Ortiz Cortes<sup>6</sup>, S.J. Camacho Freire<sup>7</sup>, P. Alonso Fernandez<sup>8</sup>, P. Jorge-Perez<sup>9</sup>, J. Lopez-Pais<sup>10</sup>, R. Bravo-Marques<sup>11</sup>, J. Palacios-Rubio<sup>3</sup>, J. Benezet-Mazuecos<sup>12</sup>, J. Cosin-Sales<sup>13</sup>

<sup>1</sup>General University Hospital Reina Sofia, Murcia, Spain; <sup>2</sup>Alvaro Cunqueiro Hospital, Cardiology, Vigo, Spain; <sup>3</sup>University Hospital Son Espases, Cardiology, Palma de Mallorca, Spain; <sup>4</sup>Hospital of Leon (Complejo Asistencial Universitario de Leon), Cardiology, Leon, Spain; <sup>5</sup>Hospital Marina Salud, Cardiology, Denia, Spain; <sup>6</sup>Hospital San Pedro de Alcantara, Cardiology, Caceres, Spain; <sup>7</sup>Hospital Juan Ramon Jimenez, Cardiology, Huelva, Spain; <sup>8</sup>Hospital de Manises, Cardiology, Valencia, Spain; <sup>9</sup>INCANIS Hospital Universitario de Canarias, Cardiology, La Laguna, Spain; <sup>10</sup>University Hospital of Santiago de Compostela, Cardiology, Santiago de Compostela, Spain; <sup>11</sup>Hospital Costa del Sol, Cardiology, Marbella, Spain; <sup>12</sup>University Hospital Quironsalud Madrid, Cardiology, Madrid, Spain; <sup>13</sup>Hospital Arnau de Vilanova, Cardiology, Valencia, Spain

**Funding Acknowledgement:** Type of funding source: Private grant(s) and/or Sponsorship. Main funding source(s): This study was supported by an unconditional grant from BMS-Pfizer

**Introduction:** Chronic kidney disease (CKD) is associated with an elevated thromboembolic and bleeding risk in atrial fibrillation (AF) patients, so the decision of antithrombotic therapy is a challenge.

**Purpose:** To analyze mortality, embolic and bleeding events in patients with advanced CKD and AF.

**Methods:** Multicentric retrospective registry on patients with AF and advanced CKD (CKD-EPI <30 mL/min/1.73 m<sup>2</sup>). For death, multivariable Cox regression analysis was developed. For embolic and bleeding events, competing-risks regression based on Fine and Gray's proportional subhazard model was performed, being death the competing event

**Results:** We analysed 405 patients with advanced CKD and newly diagnosed AF. 57 patients were not treated with antithrombotic therapy (14.1%),

80 only with antiplatelet/s (19.8%), 211 only with anticoagulation (52.1%), and 57 with anticoagulant plus antiplatelet/s (14.1%). During a follow-up of 4.6±2.5 years, 205 died (50.6%), 34 had embolic events (8.4%) and 85 had bleeding outcomes (21.0%). Bleeding event rate was significantly lower in patients without antithrombotic therapy (Figure). After multivariate analysis, anticoagulant treatment was associated with higher bleeding rates, without differences in mortality or embolic events (Table).

**Conclusion:** Anticoagulation therapy was associated with a significant increase in bleeding events in patients with advanced CKD and newly diagnosed AF. None of the antithrombotic therapy regimens resulted in lower embolic events rate neither benefit in mortality.

| Event           | Therapy                                 | HR   | 95% CI     | p     |
|-----------------|-----------------------------------------|------|------------|-------|
| Mortality       | No antithrombotic therapy               | ref  | ref        | ref   |
|                 | Only antiplatelet therapy               | 1.52 | 0.89–2.58  | 0.125 |
|                 | Only anticoagulant therapy              | 1.19 | 0.76–1.86  | 0.460 |
|                 | Anticoagulant plus antiplatelet therapy | 1.44 | 0.80–2.61  | 0.228 |
| Embolic events  | No antithrombotic therapy               | ref  | ref        | ref   |
|                 | Only antiplatelet therapy               | 1.13 | 0.36–3.53  | 0.832 |
|                 | Only anticoagulant therapy              | 0.62 | 0.21–1.79  | 0.376 |
|                 | Anticoagulant plus antiplatelet therapy | 0.57 | 0.12–2.67  | 0.475 |
| Bleeding events | No antithrombotic therapy               | ref  | ref        | ref   |
|                 | Only antiplatelet therapy               | 2.78 | 0.89–8.69  | 0.078 |
|                 | Only anticoagulant therapy              | 3.13 | 1.11–8.81  | 0.030 |
|                 | Anticoagulant plus antiplatelet therapy | 4.39 | 1.38–13.93 | 0.012 |

\*Adjusted by age, sex, chronic kidney disease stage (4 or 5), CHA2DS2-VASC and HASBLED scores.

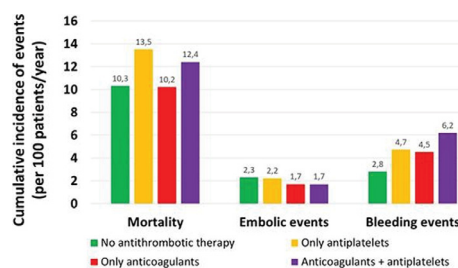

Source: http://academic.oup.com/eurheartj/article-pdf/41/Supplement_2/ehaa946.0649/34519742/ehaa946.0649.pdf
